# Supplementary material for: Catalytic asymmetric dihydroxylation of olefins using a recoverable and reusable OsO42−in ionic liquid [bmim][PF6]
Source: Royal Society of Chemistry journal article supplement (doi:10.1039/b208631j), 2002-01-01
Supplement: b208631j.doc [file b208631j.doc]

**Catalytic Asymmetric Dihydroxylation of Olefins Using a Recoverable and Reusable OsO42- in Ionic Liquid [bmim][PF6]**

Luís C. Branco and Carlos A. M. Afonso*

REQUIMTE/CQFB, Departamento de Química, Faculdade de Ciências e Tecnologia, Universidade Nova de Lisboa, 2829-516 Caparica, Portugal

**General:** The following chemicals were purchased from Aldrich and used as supplied: styrene, -methylstyrene, 1-hexene, 1-methylcyclohexene, *trans-*stilbene, *trans-*5-decene, K2CO3, K2OsO2(OH)4, K3[Fe(CN)6], (DHQD)2PHAL, (DHQD)2PYR and *tert-*butanol. All aqueous solutions were prepared using distilled water. The room temperature ionic liquid (RTIL) 1-*n*-butyl-methylimidazolium hexafluorophosphate [bmim][PF6] was prepared following reported procedures. [[1]](#endnote-2) 1H, 13C and 31P NMR spectra were recorded on a Bruker AMX 400 spectrometer. Chemical shifts are reported downfield in parts per million (ppm) from a tetramethylsilane reference for 1H and 13C NMR, and from external H3PO4 for 31P NMR. IR spectra were recorded on a Mattson Instruments model Satellite FTIR as thinly dispersed films. Gas liquid chromatography (GLC) was carried out on a Varian Star 3400 Cx gas chromatograph, using He as carrier gas and chiral capillary column Supelco -dex 120 (30m x 0.25 mm). HPLC analysis were performed using Merck & Hitachi components L-600A, L-4250, T-6300, D-6000 using Chiralpak AD at 25 ºC. Inductively Coupled Plasma spectroscopy (ICP) analysis were performed using JOBIN YVON-HORIBA, ULTIMA model, a free-running 40.68 MHz generator operating 1250 W.

Flash chromatography was carried out using an MN-Kiesel-gel 60M gel (230-400 mesh ASTM, Art. 815381). All eluents were distilled prior to use. Preparative and analytical thin layer chromatography (TLC) was carried out using, respectively, MN Kieselgel G/UV254 (Art. 816320) glass-backed plates and MN Alugram SIL G/UV254 (Art. 818133). The plates were visualised using ultraviolet light (254 nm) or using phosphomolybdic acid.

**General procedure for the Asymmetric dihydroxylation (AD) in ionic liquid [bmim][PF6]/ H2O system:** A 10 mL flask was charged with K3[Fe(CN)6] (495 mg; 1.5 mmol); K2CO3 (210 mg; 1.5 mmol); water (1.0 mL) and 1-*n*-butyl-3-methylimidazolium hexafluorophosphate [bmim][PF6] (0.5 mL), and under stirring were added the ligand [(DHQD)2PHAL or (DHQD)2PYR (1 mol%)] and the catalyst K2OsO2(OH)4 (0.5 mol%), resulting in the formation of two phases. Then, different olefins (0.5 mmol) were added to the two phase system and the reaction mixture stirred at room temperature during 24 h. The reaction mixture was extracted with dichloromethane (3 25 mL) and the resulting solution was dried (MgSO4), evaporated in *vacuo* and purified by TLC or flash chromatography.

***(R)-*1-Phenyl-1,2-ethanediol:** K3[Fe(CN)6] (495 mg), K2CO3 (210 mg), (DHQD)2PHAL (4 mg), K2OsO2(OH)4 (1 mg) and styrene (57 L) in ionic liquid [bmim][PF6]/water 1:2 (1.5 mL) were stirred for 24 h. Purification by flash chromatography using diethyl ether gave *(R)*-1-phenyl-1,2-ethanediol as a white solid (60.1 mg, 87 %; 59.4 mg, 86 % in the case of (DHQD)2PYR). The enantiomeric excess (ee) was determined by GC analysis [carrier gas flow:0.9 mL/min, T(oven)= 140 ºC; T(injector)=270 ºC; T(detector)=270 ºC]: tR = 25.2 min. (minor); tR = 26.3 min. (major); spectral data are identical to authentic sample and to those previously reported.[[2]](#endnote-3)

***(R)*-2-Phenyl-1,2-propanediol:** K3[Fe(CN)6] (495 mg), K2CO3 (210 mg), (DHQD)2PHAL (4 mg), K2OsO2(OH)4 (1 mg) and -methylstyrene (65 L) in ionic liquid [bmim][PF6]/water 1:2 (1.5 mL) were stirred for 24 h. Purification by flash chromatography using diethyl ether gave *(R)***-**2-phenyl-1,2-propanediol as a white solid (60.9 mg, 80 %; 58.6 mg, 77 % in the case of (DHQD)2PYR). The enantiomeric excess (ee) was determined by HPLC analysis [eluent: hexane/iPrOH 99.5:0.5; flow rate: 1.2 mL/min]: tR = 7.0 min. (minor); tR = 7.8 min. (major); spectral data are identical to authentic sample and to those previously reported.2

***(R)-*1,2-Hexanediol:** K3[Fe(CN)6] (495 mg), K2CO3 (210 mg), (DHQD)2PHAL (4 mg), K2OsO2(OH)4 (1 mg) and 1-hexene (63 L) in ionic liquid [bmim][PF6]/water 1:2 (1.5 mL) were stirred for 24 h. Purification by flash chromatography using diethyl ether gave *(R)-*1,2-hexanediol as a colourless oil (42.0 mg, 71 %; 56.7 mg, 96 % in the case of (DHQD)2PYR). The enantiomeric excess (ee) was determined by GC analysis [carrier gas flow:0.9 mL/min, T(oven)= 102 ºC; T(injector)=270 ºC; T(detector)=270 ºC]: tR = 25.4 min. (minor); tR = 27.1 min. (major); spectral data are identical to authentic sample and to those previously reported.2

***(1S,2R)-*1-Methyl-1,2-Cyclohexanediol:** K3[Fe(CN)6] (495 mg), K2CO3 (210 mg), (DHQD)2PHAL (4 mg), K2OsO2(OH)4 (1 mg) and 1-methyl-cyclohexene (60 L) in ionic liquid [bmim][PF6]/water 1:2 (1.5 mL) were stirred for 24 h. Purification by flash chromatography using diethyl ether gave *(1S,2R)****-***1-methyl-1,2-cyclohexanediol as a white solid (30.6 mg, 47 %; 43.0 mg, 66 % in the case of (DHQD)2PYR). The enantiomeric excess (ee) was determined by GC analysis [carrier gas flow:0.9 mL/min, T(oven)= 115 ºC; T(injector)=270 ºC; T(detector)=270 ºC]: tR = 16.0 min. (minor); tR = 16.8 min. (major); spectral data are identical to authentic sample.

***(R,R)-*1,2-Diphenyl-1,2-ethanediol:** K3[Fe(CN)6] (495 mg), K2CO3 (210 mg), (DHQD)2PHAL (4 mg), K2OsO2(OH)4 (1 mg) and *trans-*stilbene (90.2 mg) in ionic liquid [bmim][PF6]/water 1:2 (1.5 mL) were stirred for 24 h. Purification by flash chromatography using diethyl ether gave *(R,R)-*1,2-diphenyl-1,2-ethanediol as a colourless oil (93.3 mg, 87 %; 86.8 mg, 81 % in the case of (DHQD)2PYR). The enantiomeric excess (ee) was determined by HPLC analysis [eluent: hexane/iPrOH 95:5; Flow rate: 1.0 mL/min]: tR = 29.6 min. (minor); tR = 31.1 min. (major); spectral data are identical to authentic sample and to those previously reported.[[3]](#endnote-4)

***(R,R)-*5,6-Decanediol:** K3[Fe(CN)6] (495 mg), K2CO3 (210 mg), (DHQD)2PHAL (4 mg), K2OsO2(OH)4 (1 mg) and *trans-*5-decene (95 l) in ionic liquid [bmim][PF6]/water 1:2 (1.5 mL) were stirred for 24 h. Purification by flash chromatography using diethyl ether gave *(R,R)-*5,6-decanediol as a white solid (60.2 mg, 69 %; 45.3 mg, 52 % in the case of (DHQD)2PYR). The enantiomeric excess (ee) was determined by GC analysis [carrier gas flow:0.9 mL/min, T(oven)= 105 ºC; T(injector)=270 ºC; T(detector)=270 ºC]: tR = 8.1 min. (minor); tR = 9.8 min. (major); spectral data are identical to authentic sample and to those previously reported.2

**General procedure for the AD in ionic liquid [bmim][PF6]/H2O/*t*-BuOH system:** A 10 mL flask was charged with K3[Fe(CN)6] (495 mg; 1.5 mmol); K2CO3 (210 mg; 1.5 mmol); water (0.5 mL), 1*-n-*butyl-3-methylimidazolium hexafluorophosphate [bmim][PF6] (0.5 mL) and *t*-butanol (1.0 mL), and under stirring were added the ligand [(1 mol%) (DHQD)2PHAL or (DHQD)2PYR] and the catalyst K2OsO2(OH)4 (0.5 mol%). Different olefins (0.5 mmol) were then added to the homogeneous mixture and the reaction mixture stirred at room temperature during 24 h. The reaction mixture was extracted with dichloromethane (3  25 mL) and the resulting solution was dried (MgSO4), evaporated in *vacuo* and purified by TLC or flash chromatography as described before

**General procedure for the recycling and reuse of Os-Ionic liquid in [bmim][PF6]/H20:** A 10 mL flask was charged with K3[Fe(CN)6] (495 mg; 1.5 mmol); K2CO3 (210 mg; 1.5 mmol); water (3 mL) and 1-*n*-butyl-3-methylimidazolium hexafluorophosphate [bmim][PF6] (3 mL), and under stirring were added the ligand [(DHQD)2PHAL] (4 mg; 1 mol%) and the catalyst K2OsO2(OH)4 (1.0 ± 0.1 mg; 0.5 mol%). 1-Hexene (63 µL) was then added and the resulting mixture stirred for 24 h at room temperature. The aqueous phase was then removed and determined the osmium content by ICP analysis. The ionic liquid phase was extracted with diethyl ether (1x7 mL) and the ethereal layer was dried (MgSO4), evaporated in *vacuo* and purified by flash chromatography using diethyl ether. Then, more 1-hexene (63 µl), K3[Fe(CN)6] (495 mg; 1.5 mmol); K2CO3 (210 mg; 1.5 mmol) and water (3 mL) was added to the recycled [bmim][PF6] and the cycle repeated. The obtained yield and ee are presented in Table 2. In case of entry 12 a new portion of catalyst (0.5 mol%) and ligand (1.0 mol%) was added into the ionic reaction mixture. The other parallel experiment was performed as described before and used for the determination of the osmium content (in relation to initial amount) in the aqueous, ethereal and ionic liquid phases. In the case of the ionic liquid phase, was taken 50 L of the [bmim][PF6] before the addition of the reagents to the next cycle.

**General procedure for the recycling and reuse of Os-Ionic liquid in [bmim][PF6]/H20/*t-*BuOH:** A 10 mL flask was charged with K3[Fe(CN)6] (495 mg; 1.5 mmol); K2CO3 (210 mg; 1.5 mmol); water (2.5 mL); *t-*butanol (2.5 mL) and 1-*n-*butyl-3-methylimidazolium hexafluorophosphate [bmim][PF6] (2.5 mL), and under stirring were added the ligand [(DHQD)2PHAL] (4 mg; 1 mol%) and the catalyst K2OsO2(OH)4 (1.0 ± 0.1 mg; 0.5 mol%). 1-Hexene (63 µL) was then added and the resulting mixture stirred for 24 h at room temperature. Water (2 mL) was added and the aqueous phase was removed and determined the osmium content by ICP analysis. The remaining phase was extracted with diethyl ether (1x7 mL) and the etheral layer was dried (MgSO4), evaporated in vacuo and purified by flash chromatography using diethyl ether. Then, more 1-hexene (63 µL), K3[Fe(CN)6] (495 mg; 1.5 mmol); K2CO3 (210 mg; 1.5 mmol), water (2.5 mL) and t-butanol (5 mL) was added to the recycled [bmim][PF6] and the cycle repeated. The obtained yields and ee are presented in Table 2. In case of entry 13 new portion of catalyst (0.5 mol%) and ligand (1.0 mol%) was added into the ionic reaction mixture. The other parallel experiment was performed as described before and used for the determination of the osmium content (in relation to initial amount) in the aqueous, etheral and ionic liquid phases. In the case of the ionic liquid phase was taken 50 L of the [bmim][PF6] before the addition of the reagents to the next cycle.

**General Procedure for the determination of Os in each phase of the recycling and reuse experiments:** For the determination of the osmium content, was prepared an initial aqueous solution of osmium (100 ppm) using K2OsO2(OH)4 as the Os source. Then, were prepared different solutions: 40, 20, 10, 5, 2, 1, 0.4 ppm, which were used to obtain the calibration curve. [C = 0.4594 + 0.0001296*X, where C is concentration and X is the measured intensity in the ICP]. The observed detection limit was of 1 ppb, which corresponds to 7 ppb for each original phase. After each recycling experiment, the aqueous phase (3 mL or 2.5 mL) was removed and diluted in 100 mL of distilled water. Each etheral layer was evaporated in *vacuo* and the residue was diluted in 50 mL of distilled water (containing 2 % of methanol). For each recycling experiment was taken 50 L of the ionic liquid [bmim][PF6], and diluted in 50 or 25 mL of distilled water (containing 2 % methanol). The aqueous, organic and ionic liquid phases prepared were analysed by Inductively Coupled Plasma spectroscopy (ICP) for Osmium content (= 228.226 nm), using the calibration curve described above.

**Comparison of Spectral Data (1H and 13C NMR) of the Ionic Liquid [bmim][PF6] Between the Initial and Recycled Samples**

1H NMR spectra (in *d6*-DMSO) of initial [bmim][PF6]

13C NMR spectra (in *d6-*DMSO) of initial [bmim][PF6]

1H NMR spectra (in *d6-*DMSO) of the ionic liquid phase after run 13 using water/ [bmim][PF6] system

13C NMR spectra (in *d6-*DMSO) of the ionic liquid phase after run 13 using water/ [bmim][PF6] system

1H NMR spectra (in *d6-*DMSO) of the ionic liquid phase after run 13 using water/ [bmim][PF6]/ *t-* butanol system

13C NMR spectra (in *d6-*DMSO) of the ionic liquid phase after run 13 using water/ [bmim][PF6]/ *t-* butanol system

1. a) T. Kitazume, F. Zulfiqar, G. Tanaka, *Green Chemistry*, 2000, **2**, 133; b) A. E Visser,. R. P. Swatloski, R. D. Rogers, *Green Chemistry*, 2000, **2**, 1. [↑](#endnote-ref-2)
2. S. Kobayashi, M. Endo, S. Nagayama, *J. Am. Chem. Soc.* 1999, **121**,11229. [↑](#endnote-ref-3)
3. Q. Yao, *Org. Lett.* 2002, **4**,2197. [↑](#endnote-ref-4)
